SPRING 2020 | VOLUME 18 | NUMBER 2

# Focus

The Journal of Lifelong Learning in Psychiatry

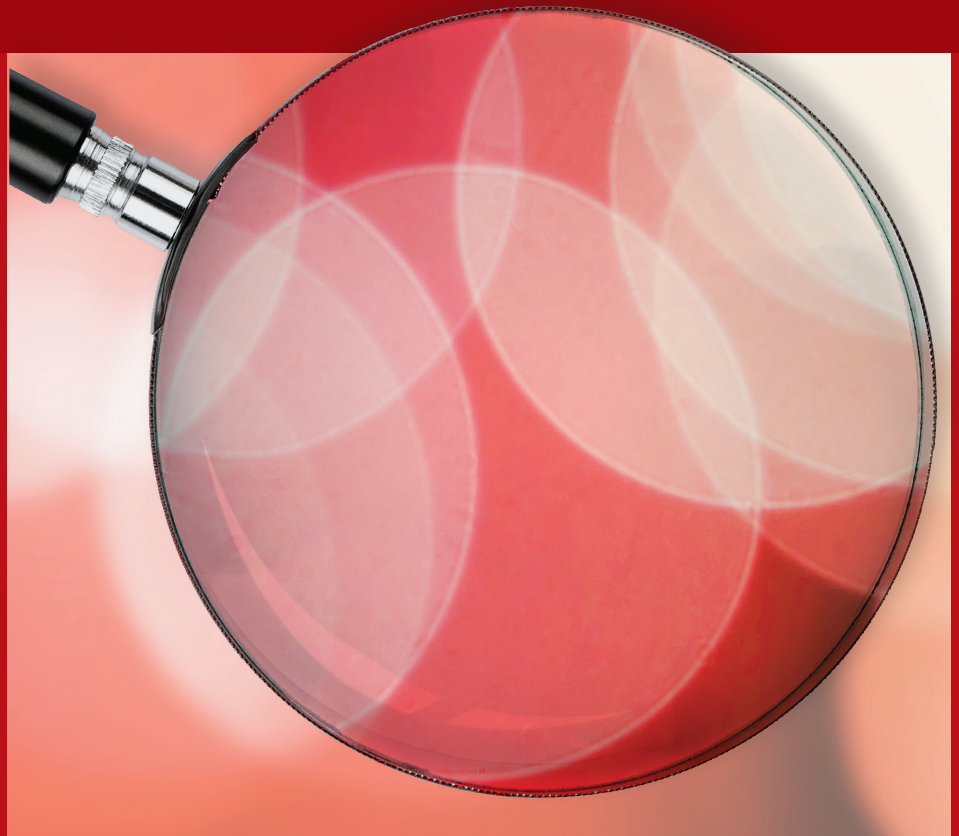

## **NNDC Special Issue: Challenges of Mood Disorders Care**

Guest editors: John F. Greden, M.D., and J. Raymond DePaulo, Jr., M.D.,

AMERICAN  
**PSYCHIATRIC**  
ASSOCIATION 

[focus.psychiatryonline.org](http://focus.psychiatryonline.org)

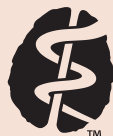

## APA Publishing

### *Publisher*

John McDuffie  
*Editorial Director, Journals*  
Michael D. Roy  
*Managing Editor, Journals*  
Demarie S. Jackson  
*Production Manager, Journals*  
Wendy Lieberman Taylor

## APA Department of Continuing Medical Education

*Associate Director, Focus*  
Kristen Moeller  
*Editorial Manager, CME and MOC*  
Ann Thomas

*Focus* (ISSN 1541-4094) is published quarterly by the American Psychiatric Association, 800 Maine Ave. S.W., Suite 900, Washington, D.C. 20024. Printed in U.S.A. Periodicals postage paid at Washington, D.C., and additional mailing offices. POSTMASTER: Send all address changes to *Focus*, Circulation Department, American Psychiatric Association Publishing, 800 Maine Ave. S.W., Suite 900, Washington, D.C. 20024.

## Subscriptions

U.S. APA member \$441, U.S. non-member \$690. For additional subscription options, including international and student rates, contact Customer Service at (202) 559-3900 or (800) 368-5777.

## Officers of the Association

Bruce J. Schwartz, M.D., M.A., *President*  
Jeffrey Geller, M.D., M.P.H., *President-Elect*  
Saul Levin, M.D., M.P.A., *CEO and Medical Director*

## Editorial Offices

Telephone: (202) 559-3897  
Journal Web site: [focus.psychiatryonline.org](http://focus.psychiatryonline.org)  
*Focus* CME: [psychiatryonline.org/cme](http://psychiatryonline.org/cme)

## Change of Address and Assistance With Subscriptions

Contact Customer Service at (202) 559-3900 or (800) 368-5777 or e-mail [appi@psych.org](mailto:appi@psych.org).

## CME

Telephone: (202) 559-3897  
Email: [educme@psych.org](mailto:educme@psych.org)

## Online Access

Call (800) 368-5777 or e-mail [appi@psych.org](mailto:appi@psych.org) for assistance with online access to *Focus* and CME activities.

## APA Learning Center

[education.psychiatry.org](http://education.psychiatry.org)

Copyright © 2020, American Psychiatric Association

## Editor

Mark Hyman Rapaport, M.D.  
*Atlanta, Georgia*

## Applied Armamentarium

Boadie Dunlop, M.D.  
*Atlanta, Georgia*

## Communication Commentary

Dorothy E. Stubbe, M.D.  
*New Haven, Connecticut*

## Ethics Commentary

Laura B. Dunn, M.D.  
*Palo Alto, California*

## Patient Management Exercise

Ian A. Cook, M.D.  
*Los Angeles, California*

## Safety Commentary

Yad M. Jabbarpour, M.D.  
*Catawba, Virginia*

## Senior Advisory Board

Carol A. Bernstein, M.D.  
*New York, New York*  
Kathleen T. Brady, M.D., Ph.D.  
*Charleston, South Carolina*  
Peter F. Buckley, M.D.  
*Richmond, Virginia*  
Glen O. Gabbard, M.D.  
*Houston, Texas*  
Ira M. Lesser, M.D.  
*Torrance, California*  
Charles F. Reynolds III, M.D.  
*Pittsburgh, Pennsylvania*  
Pedro Ruiz, M.D.  
*Houston, Texas*  
Stephen C. Scheiber, M.D.  
*Glenview, Illinois*  
Daniel K. Winstead, M.D.  
*New Orleans, Louisiana*  
Joel Yager, M.D.  
*Denver, Colorado*

## Editorial Board

Richard Balon, M.D.  
*Rochester Hills, Michigan*  
Joseph A. Cheong, M.D.  
*Nashville, Tennessee*  
Raymond Lam, M.D., F.R.C.P.C.  
*Vancouver, Canada*  
Sherrell T. Lam, MD, F.A.C.P.  
*Bethesda, Maryland*

Avram H. Mack, M.D.  
*Philadelphia, Pennsylvania*  
Vishal Madaan, M.D., M.B.B.S.  
*Charlottesville, Virginia*  
David Mischoulon, M.D., Ph.D.  
*Boston, Massachusetts*  
Francisco A. Moreno, M.D.  
*Tucson, Arizona*  
Philip R. Muskin, M.D.  
*New York, New York*  
Michele T. Pato, M.D., M.P.H.  
*Brooklyn, New York*  
Jeffrey Rakofsky, M.D.  
*Atlanta, Georgia*  
Lori E. Raney, M.D.  
*Dolores, Colorado*  
Victor I. Reus, M.D.  
*San Francisco, California*  
James W. Thompson, M.D., M.P.H.  
*Palm Beach, Florida*  
Marcia L. Verduin, M.D.  
*Orlando, Florida*  
Sidney Zisook, M.D.  
*San Diego, California*

## Associate Editors eFOCUS

David L. Fogelson, M.D.  
*Los Angeles, California*  
Robert J. Boland, M.D.  
*Boston, Massachusetts*

## Focus Self-Assessment

### Editorial Board

Rashi Aggarwal, M.D.  
*Newark, New Jersey*  
Nicole Cotton, M.D.  
*Atlanta, Georgia*  
Vikas Gupta, M.D., M.P.H.  
*Greenville, North Carolina*  
Venkata Kolli, M.B.B.S.  
*Omaha, Nebraska*  
Vishal Madaan, M.D.  
*Charlottesville, Virginia*  
Lindsay J. Moskowitz, M.D.  
*New Hyde Park, New York*  
Jose Vito, M.D.  
*New York, New York*

## Editor Emerita

Deborah J. Hales, M.D.  
*Washington, D.C.*

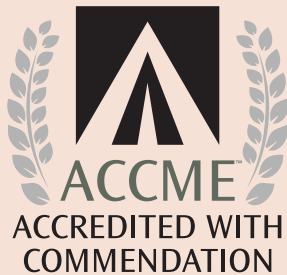

#### EDUCATIONAL OBJECTIVES

*Focus*, the APA clinical review and continuing medical education (CME) journal, is designed as a personal study resource to help practicing psychiatrists keep abreast of significant advances in the field, with particular attention to clinical practice.

With each issue, participants review current knowledge, recognize gaps in learning, and increase their understanding of an important topic in the field of psychiatry.

Participants also can prepare for an annual self-assessment designed to aid the physician in addressing areas where more study is needed to enhance management of patients.

#### TO EARN CME CREDIT

Each issue, prepared by distinguished faculty who are recognized leaders in their fields, incorporates a CME component. To earn CME credit for *Focus*, subscribers should read through the material presented in each issue. After reading the material, complete the CME Quiz online at [focus.psychiatryonline.org](http://focus.psychiatryonline.org), and earn credit with a passing score of 60%.

#### ACCREDITATION AND DESIGNATION

The American Psychiatric Association is accredited by the Accreditation Council for Continuing Medical Education (ACCME) to provide CME for physicians. The APA designates this journal-based CME activity for a maximum of 5 AMA PRA Category 1 credits™. Physicians should claim only the credit commensurate with the extent of their participation in the activity.

Neither the American Psychiatric Association nor American Psychiatric Association Publishing holds itself responsible for statements made in its publications by contributors. Unless so stated, material in *Focus* does not reflect the endorsement, official attitude, or position of the American Psychiatric Association, American Psychiatric Association Publishing, or the journal's Editorial Board.

Material published in the journals of the American Psychiatric Association is protected by copyright and all rights are reserved. Material may not be reproduced in any form or by any means without written permission from the copyright owner. For permission to reproduce material from American Psychiatric Association journals, please visit [www.appi.org/CustomerService/Pages/Permissions.aspx](http://www.appi.org/CustomerService/Pages/Permissions.aspx) for more information. Permission can also be secured through the Copyright Clearance Center ([www.copyright.com](http://www.copyright.com)). For bulk reprints, please contact [permissions@psych.org](mailto:permissions@psych.org).

This consent does not extend to other kinds of copying, such as copying for general distribution, for advertising or promotional purposes, for creating new collective works, or for resale. Permission need not be obtained for photocopying isolated articles for nonprofit classroom or library reserve use; all fees associated with such permission are waived.

# Focus

The Journal of Lifelong Learning in Psychiatry

"Lifelong Learning in Psychiatry" is an evolving series of educational initiatives developed by the American Psychiatric Association to meet the changing needs of psychiatrists for the 21st century.

*Focus* offers clinical reviews and original research for practicing psychiatrists to keep abreast of significant advances in the field. Developed as part of APA's "Lifelong Learning in Psychiatry" series—educational initiatives to meet the changing needs of psychiatrists for the 21st century—*Focus* has as its goal the dissemination of up-to-date information while facilitating lifelong study skills and critical self-assessment for improving patient care and preparation for maintenance of certification. Each issue is designed as a personal study resource with particular attention to clinical practice and offers opportunities to earn AMA PRA Category 1 Credit™.

#### The American Board of Psychiatry and Neurology

The American Board of Psychiatry and Neurology has reviewed *Focus: The Journal of Lifelong Learning in Psychiatry* and the *Focus Self-Assessment Examination* and has approved this program as part of a comprehensive lifelong learning and self-assessment program, which is mandated by the American Board of Medical Specialties as a necessary component of maintenance of certification.

#### Royal College of Physicians and Surgeons of Canada

The *Focus Self-Assessment* is an Accredited Self-Assessment Program (Section 3) as defined by the Maintenance of Certification Program of the Royal College of Physicians and Surgeons of Canada, and approved by the Canadian Psychiatric Association. You may claim a maximum of 24 hours (credits are automatically calculated).

#### Improvement in Medical Practice/Performance in Practice (PIP) Clinical Modules Published in *Focus*

Contact American Psychiatric Association, Department of CME, [educme@psych.org](mailto:educme@psych.org) for information regarding revised end dates and updates to the MOC Part 4 PIP clinical modules. Performance in Practice modules are available to all *Focus* subscribers online in the APA Learning Center at [education.psychiatry.org](http://education.psychiatry.org).

**Editor and Advisor Program Planner Disclosure Listing for *Focus*, eFOCUS and *Focus*, Self-Assessment Editors, Associate Editors, Editorial Boards, and staff:**

Kathleen T. Brady, M.D., consultant at Embera Pharmaceuticals, Genomind, IncKa. Ian Cook M.D., active biomedical device patents assigned to the University of California; advised at HeartCloud, Inc.; chief executive officer of HeartCloud and BrainCloud Corp; chief medical officer and senior vice president (currently on leave) of NeuroSigma, the licensee of some of Dr. Cook's inventions; stock options, NeuroSigma. Boadie Dunlop, M.D., grant/research funding from Acadia, Aptinyx, Compass Pathways, Intracellular Therapies, Sage, Takeda; consultant at Myriad Neuroscience Sophren Therapeutics. Raymond Lam, M.D., ad hoc consulting and advisory boards at Akili, Allergan, Asia-Pacific Economic Cooperation, Canadian Network for Mood and Anxiety Treatments, CME Institute, Janssen, Lundbeck, Medscape, Otsuka, Pfizer; grant/research funding administered through University of British Columbia: BC Leading Edge Endowment Fund, Canadian Institutes of Health Research, Canadian Network for Mood and Anxiety Treatments, Healthy Minds Canada, Janssen, Lundbeck, MITACS, Movember Foundation, Ontario Brain Institute, Pfizer, St. Jude Medical, University Health Network Foundation, VGH & UBCH Foundation. Vishal Madaan, M.D., grant/research funding from Allergan, Boehringer-Ingelheim, Neurocrine, Otsuka, Pfizer, Shire, Supernus. David Mischoulon, M.D., Ph.D., unpaid consulting at Pharmavite LLC and Gnosis USA, Inc.; grant/research funding from Nordic Naturals (donated drug and placebo for a study). Francisco A. Moreno, M.D., consultant at Liva Nova. Jeffrey J. Rakofsky, M.D., grant/research funding from Sage, Takeda. Sidney Zisook, M.D., consultant at Defender Pharmaceutical; grant/research funding from Compass, Ltd.

**Editors and Members of the Editorial Boards of *Focus* and the *Focus* Self-Assessment and staff listed below report no disclosures:**

Rashi Aggarwal, M.D., Richard Balon, M.D., Carol A. Bernstein, M.D., Robert J. Boland, M.D., Peter F. Buckley, M.D., Ph.D., Josepha A. Cheong, M.D., Nicole Cotton, M.D., Laura B. Dunn, M.D., Laura Fochtmann, M.D., David L. Fogelson, M.D., Glen O. Gabbard, M.D., Tristan Gorrindo, M.D., Vikas Gupta, M.D., M.P.H., Yad M. Jabbarpour, M.D., Venkata Kolli, M.B.B.S., Sherrell T. Lam, M.D., Ira M. Lesser, M.D., Avram H. Mack, M.D., Kristen Moeller, Lindsay J. Moskowitz, M.D., Philip R. Muskin, M.D., Michele T. Pato, M.D., M.P.H., Lori E. Raney, M.D., Mark H. Rapaport, M.D., Victor I. Reus, M.D., Charles F. Reynolds, III, M.D., Pedro Ruiz, M.D., Stephen C. Scheiber, M.D., Dorothy E. Stubbe, M.D., James W. Thompson, M.D., M.P.H., Marcia L. Verduin, M.D., Jose Vito, M.D., Daniel K. Winstead, M.D., Joel Yager, M.D.

The American Board of Psychiatry and Neurology has approved the following *Focus* Performance in Practice clinical chart review tools of the American Psychiatric Association as Maintenance of Certification, Part 4, Clinical Modules.

Performance in Practice: Physician Practice Assessment  
Tool for the Assessment and Treatment of Adults at  
Risk for Suicide and Suicide-Related Behaviors

March 2011–March 2023

Performance in Practice: Clinical Module for  
Screening Adult Psychiatric Patients for Substance  
Use Disorders

September 2018–September 2021

**PIP Clinical Modules online (MOC Part 4)**

FOCUS subscribers who are also APA members: Access and complete PIP Clinical Modules online in the APA Learning Center at [education.psychiatry.org](http://education.psychiatry.org) using your APA member login.

Non-member subscribers: Contact [educme@psych.org](mailto:educme@psych.org) for access to PIP Clinical Modules online at [education.psychiatry.org](http://education.psychiatry.org).

## FROM THE GUEST EDITOR

---

### 87 NNDC Special Issue: Challenges of Mood Disorders Care

*John F. Greden, M.D., and J. Raymond DePaulo, Jr., M.D.*

## REVIEWS

---

### 88 Suicide Risk Assessment and Prevention: Challenges and Opportunities

*Eileen P. Ryan, D.O., and Maria A. Oquendo, M.D., Ph.D.*

Strategies such as restricting access to lethal means and treating a comorbid psychiatric disorder are effective in suicide risk assessment and management. Various scientific and technological advances may enhance the ability to identify and treat at-risk patients, but further research is needed.

### 100 Clinical Perspective on Opioids in the Context of Suicide Risk

*Paul S. Nestadt, M.D., and Amy S. B. Bohnert, Ph.D., M.H.S.*

Rising rates of suicide and opioid overdose deaths in the U.S. may be linked. Interventions targeting shared risk factors and tools, such as naloxone, medications for opioid use disorders, and improved risk screening and prescription methods, should be implemented to reduce risk.

### 106 Is Postpartum Depression Different From Depression Occurring Outside of the Perinatal Period? A Review of the Evidence

*Melissa M. Batt, M.D., M.P.H., et al.*

Evidence as to whether postpartum depression (PPD) is distinct from major depressive disorder is mixed, affected largely by how the postpartum period is defined. This review found that depression occurring in the early postpartum period may be distinct whereas depression occurring in the later postpartum period may be more like major depressive disorder.

## FEATURES

---

### CLINICAL SYNTHESIS

### 120 Consequences of Recurrence of Major Depressive Disorder: Is Stopping Effective Antidepressant Medications Ever Safe?

*Jennifer Severe, M.D., et al.*

People who experience a major depressive episode often face a recurring longitudinal treatment course. The time has come for major depressive disorder to be categorized as a chronic illness, such as diabetes and heart disease, for which prevention and maintenance of wellness interventions are imperative.

### 129 The Care of Patients With Complex Mood Disorders

*Zachary A. Corder, M.D., Ph.D., et al.*

Perspectives are offered on treatment management for patients with mood disorders complicated by physical and psychological disorders, personality vulnerabilities, drug misuse, and/or interpersonal problems. These commonly encountered conditions can make depressive states harder to treat.

### 139 Management of Complex Co-occurring Psychiatric Disorders and High-Risk Behaviors in Adolescence

*Justine W. Welsh, M.D., et al.*

Early, adequate, and individualized cross-sectional analysis of foreseeable risk for comorbid psychopathology of adolescents can inform preventive measures and behavioral therapies for conditions ranging from disordered eating to suicidal ideation and self-harm.

**Features, continued**

**150 Depression Comorbid With Stroke, Traumatic Brain Injury, Parkinson's Disease, and Multiple Sclerosis: Diagnosis and Treatment**

*Susan K. Conroy, M.D., Ph.D., et al.*

For patients with stroke, traumatic brain injury, Parkinson's disease, and multiple sclerosis, the diagnosis and treatment of depression can be particularly challenging. For each of these neurologic disorders, this review assesses screening tools, etiological factors, and evidence for various depression treatments.

**162 Computer-Assisted CBT and Mobile Apps for Depression: Assessment and Integration Into Clinical Care**

*Jesse H. Wright, M.D., Ph.D., and Matthew Mishkind, Ph.D.*

Two experts in treating depression with the help of computer-assisted CBT and mobile apps offer an introduction to these technological tools. How effective are they? Advantages and disadvantages? How can clinicians choose the most useful ones? And how best to introduce them into clinical practice?

**169 Advancing Treatment of Depression and Other Mood Disorders Through Innovative Models of Telepsychiatry**

*Jay H. Shore, M.D., M.P.H., et al.*

Innovative models of telepsychiatric care are reviewed, including the use of videoconferencing and asynchronous telepsychiatry, which are reconfiguring psychiatric care delivery and improving the quality of, and access to, care for depression and other mood disorders.

**175 Real-Time Monitoring: A Key Element in Personalized Health and Precision Health**

*John Zulueta, M.D., et al.*

Numerous advances in computing and sensor technologies can enhance objective, real-time data collection and patient outcome prediction, informing the diagnosis and management of psychiatric disorders but also prompting concern for ensuring data integrity and ethical and legal issues.

**181 Next-Step Treatment Considerations for Patients With Treatment-Resistant Depression That Responds to Low-Dose Intravenous Ketamine**

*William V. Bobo, M.D., M.P.H., et al.*

Strategies to extend an acute response to ketamine for patients with treatment-resistant unipolar or bipolar depression are reviewed. Next treatment steps may include maintenance ketamine or esketamine, other pharmacotherapies, electroconvulsive therapy, and other approaches, although none are backed by strong evidence.

**PATIENT MANAGEMENT EXERCISE**

**193 Postpartum Depression**

*Ian A. Cook, M.D.*

**COMMUNICATION COMMENTARY**

**197 Abating Ambivalence: Motivating Depressed Patients for Treatment**

*Dorothy E. Stubbe, M.D.*

**ETHICS COMMENTARY**

**201 Ethical Issues in the Evaluation and Treatment of Depression**

*Alissa Megan Rogol, M.D., J.D.*

**INFLUENTIAL PUBLICATIONS**

---

**205 Bibliography**

**208 Abstracts**

**211 Optimal Dose of Selective Serotonin Reuptake Inhibitors, Venlafaxine, and Mirtazapine in Major Depression: A Systematic Review and Dose-Response Meta-Analysis**

*Toshi A. Furukawa, et al.*

**220 Prognosis and Improved Outcomes in Major Depression: A Review**

*Christoph Kraus, et al.*

**Influential Publications, continued**

**236** Single, Repeated, and Maintenance Ketamine Infusions for Treatment-Resistant Depression: A Randomized Controlled Trial

*Jennifer L. Phillips, Ph.D., et al.*

**244** Improving Depression Outcome by Patient-Centered Medical Management

*A. John Rush, M.D., and Michael E. Thase, M.D.*

**DEPARTMENTS**

---

**128** Call for Papers

**192** Call for Papers: The Applied Armamentarium

**207** Call for Papers: 21st-Century Psychiatrist

**219** *Focus Subscribers*: Claiming Your Issue Quiz Credit

**255** Continuing Medical Education Quiz

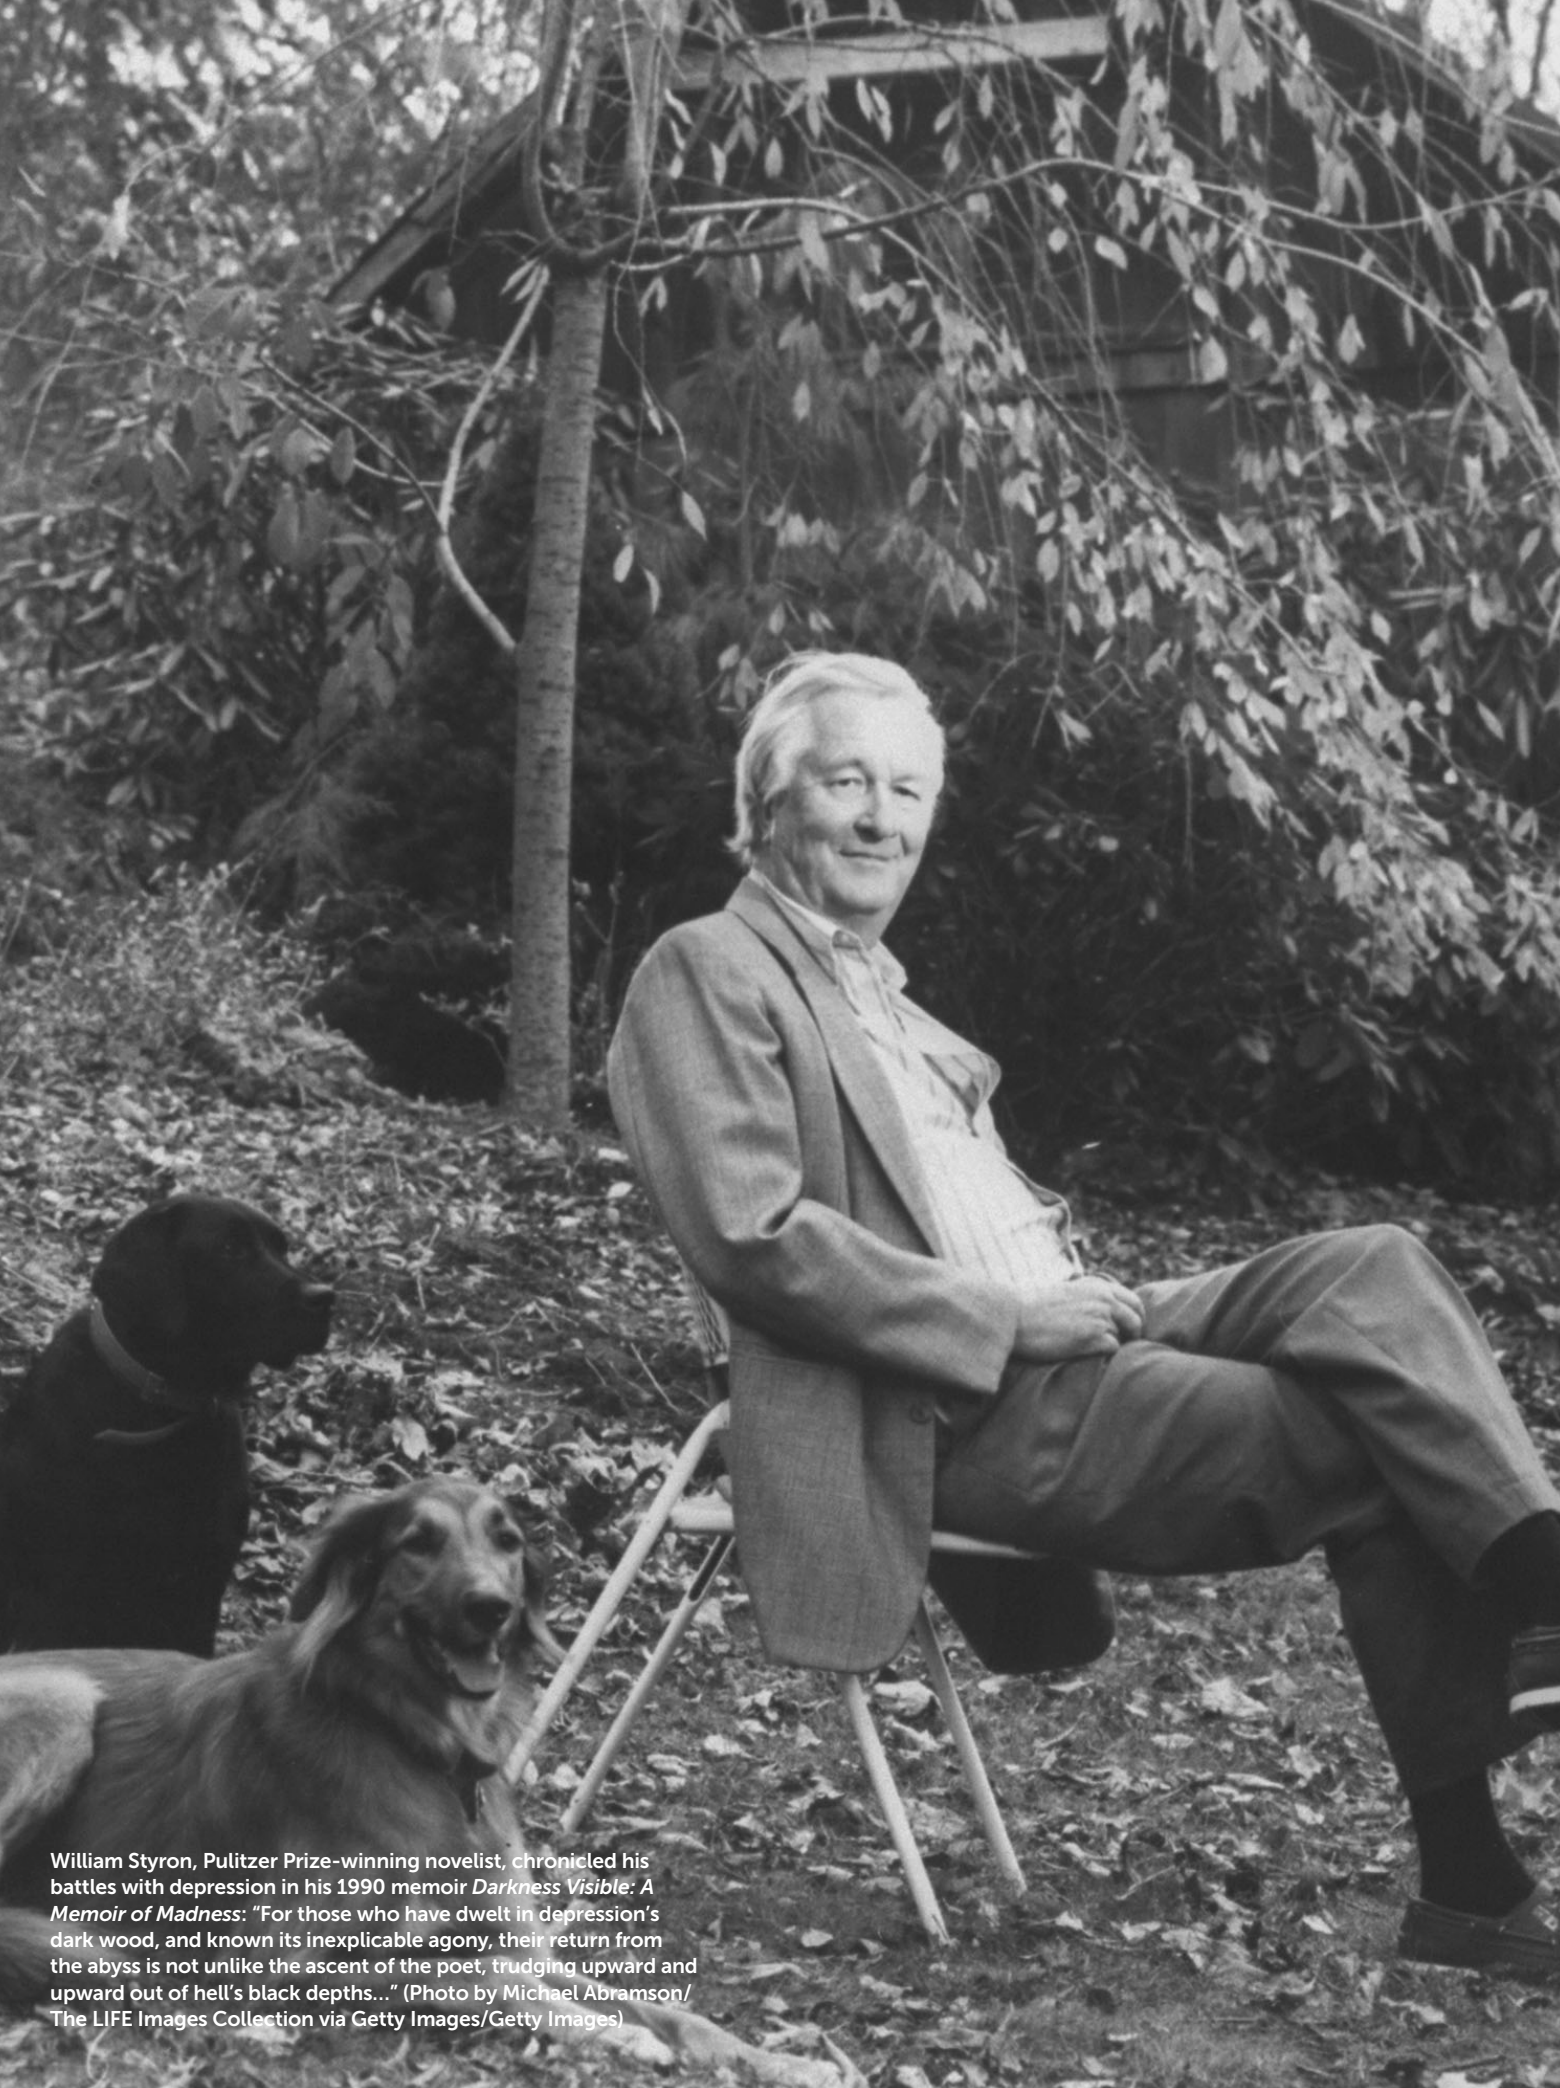

William Styron, Pulitzer Prize-winning novelist, chronicled his battles with depression in his 1990 memoir *Darkness Visible: A Memoir of Madness*: "For those who have dwelt in depression's dark wood, and known its inexplicable agony, their return from the abyss is not unlike the ascent of the poet, trudging upward and upward out of hell's black depths..." (Photo by Michael Abramson/The LIFE Images Collection via Getty Images/Getty Images)
