SPRING 2020 | VOLUME 18 | NUMBER 2

# Focus

The Journal of Lifelong Learning in Psychiatry

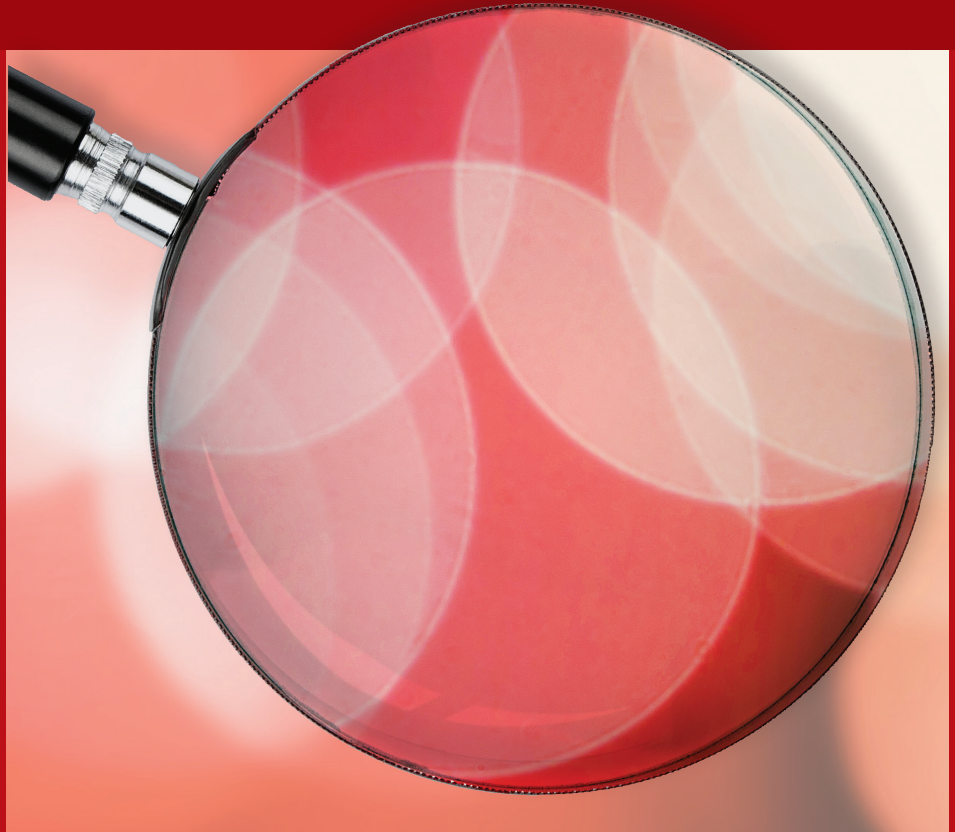

## NNDC Special Issue: Challenges of Mood Disorders Care

Guest editors: John F. Greden, M.D., and J. Raymond DePaulo, Jr., M.D.,

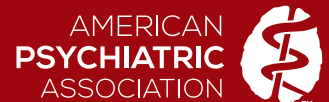

[focus.psychiatryonline.org](http://focus.psychiatryonline.org)

MOOD DISORDERS

SPRING 2020 | VOLUME 18 | NUMBER 2

FOCUS
